# Supplementary material for: Musical components important for the Mozart K448 effect in epilepsy
Source: PubMed Central journal article supplement (PMC8446029; doi:10.1038/s41598-021-95922-7), 2021-09-16
Supplement: 41598_2021_95922_MOESM1_ESM.pdf [file 41598_2021_95922_MOESM1_ESM.pdf]

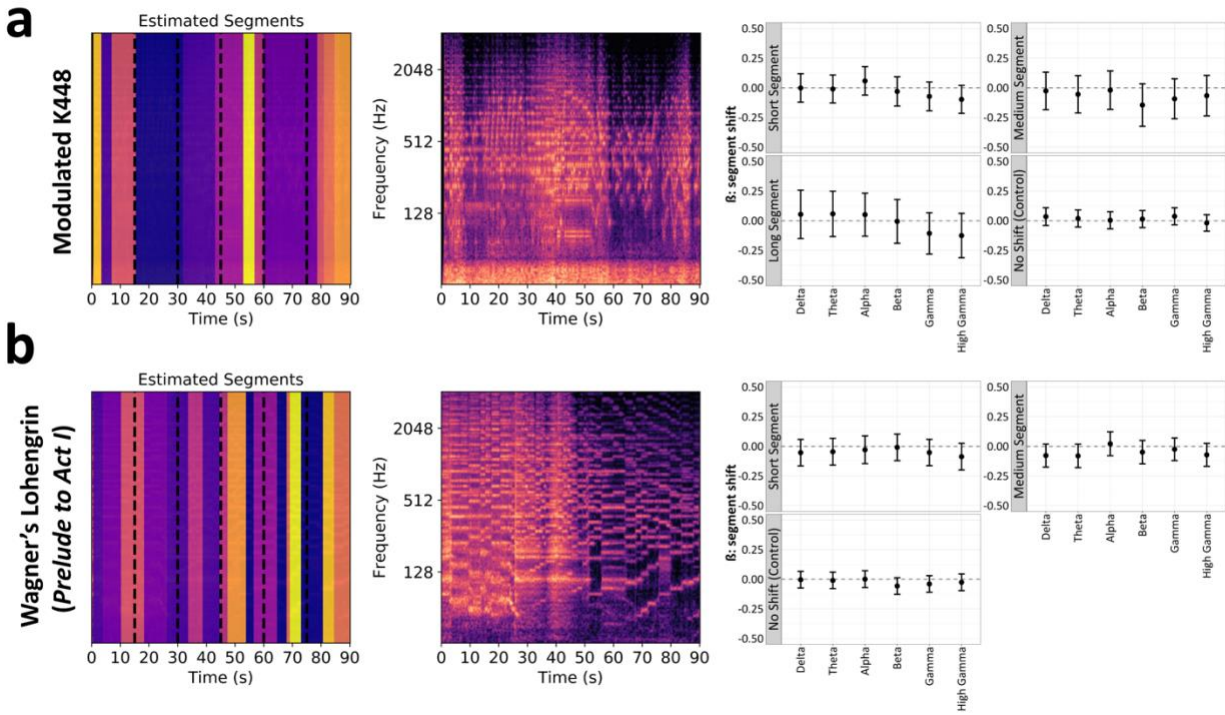

**Supplementary Figure 1. Evaluation of spectral power and segment shifts in other compositions.** (a) The filtered version of K448 (gamma frequency boosted) revealed nonsignificant associations between all spectral powerbands and musical segment categories in the frontal cortex. (b) Wagner's Lohengrin (*Prelude to Act I*) also revealed nonsignificant associations between all powerbands and musical segment categories in the frontal cortex. Significance at \* $p < 0.05$ , \*\* $p < 0.01$ , \*\*\* $p < 0.001$ .
